In the article “An in vitro Comparative Assessment of Single-Use Flexible Ureteroscopes Using a Standardized Ureteroscopy Training Model” [Urol Int. DOI: 10.1159/000525246] by So et al., the technical specifications of one of the single-use flexible ureteroscopes (su-fURS) used were incorrectly detailed in Table 1. The PUSEN 3033A su-fURS has both a tip and shaft diameter of 7.5 Fr instead. The authors apologize for the error. The corrected Table 1 is shown here.

**Table 1.** Technical Features of Ureteroscopes

| Details                      | Boston<br>LithoVue | PUSEN<br>PU3033A | REDPINE<br>RP-U-C12 | INNOVEX<br>EU-Scope™ US31B-12 |
|------------------------------|--------------------|------------------|---------------------|-------------------------------|
| Manufacturer                 | Boston Scientific  | PUSEN Medical    | REDPINE Medical     | SHANGHAI ANQING Medical       |
| Type of Use                  | Single-Use         | Single-Use       | Single-Use          | Single-Use                    |
| Optical System               | Digital CMOS       | Digital CMOS     | Digital CMOS        | Digital CMOS                  |
| Length, mm                   | 680                | 650              | 670                 | 650                           |
| Working Channel(s)           | 1                  | 1                | 1                   | 1                             |
| Working Channel Diameter, Fr | 3.6                | 3.6              | 3.2                 | 3.6                           |
| Tip Diameter, Fr             | 7.7                | <b>7.5</b>       | 8.7                 | 9.3                           |
| Shaft Diameter, Fr           | 9.5                | <b>7.5</b>       | 9.12                | 8.7                           |
| Direction of Deflection      | Bidirectional      | Bidirectional    | Bidirectional       | Bidirectional                 |
| Degree of Deflection, °      | 270/270            | 270/270          | 270/270             | 275/275                       |
